# Supplementary material for: Curative Anti‐Inflammatory Properties of Chinese Optimized Yinxieling Formula in Models of Parkinson’s Disease
Source: Hindawi journal article supplement (doi:10.1155/2018/6142065), 2018-01-01
Supplement: f1 [file 6142065.f1.pdf]

## **Supplement data**

### **Supplementary method 1**

#### **Determination of TNF- $\alpha$ , IL-1 $\beta$ , and IL-6 by ELISA.**

Measurement of cytokines (TNF- $\alpha$ , IL-1 $\beta$ , and IL-6) were determined by ELISA.

BV-2 cells ( $1 \times 10^5$  cells per well in a 24 well plate) were exposed to different concentrations of OYFCS (2.5, 5 and 10%) for 2 h, followed by the addition of LPS (100ng/mL) or LPS alone in the presence of serum. The supernatants of the cultured BV-2 cells were collected 24 h after LPS stimulation; Midbrain tissue (100 mg) was rinsed with  $1 \times$  PBS, homogenized in 1 mL of  $1 \times$  PBS and stored overnight at  $-20^\circ\text{C}$ . After two freeze-thaw cycles were performed to break the cell membranes, the homogenates were centrifuged for 5 minutes at 5000 g,  $2 - 8^\circ\text{C}$ . The supernatant was obtained and adjusted to the final protein concentration of 1 mg/mL for the cytokine testing. The concentrations of TNF- $\alpha$ , IL-1 $\beta$ , and IL-6 were measured by commercial ELISA Kit (CUSABIO, China) according to the manufacturer's protocol.

### **Legends for Supplemental Figures**

Supplemental Figure 1

#### **Suppression of secretion of pro-inflammatory cytokines by OYFCS in LPS-stimulated BV-2 cells.**

Twenty-four hours prior to the LPS treatment (100ng/mL), BV2 cells were

subjected to a two-hour incubation with OYFCS at different concentrations. The protein level of TNF- $\alpha$ , IL-1 $\beta$ , and IL-6 were determined by ELISA. LPS exposure led to increased levels of pro-inflammatory TNF- $\alpha$ (A), IL-1 $\beta$ (B), and IL-6 (C). Pretreatment with OYFCS reduced levels of TNF- $\alpha$ , IL-1 $\beta$  and IL-6 significantly. Values are depicted as mean  $\pm$  standard deviation (n=3) for three independent experiments. <sup>##</sup>*P* < 0.01 vs. control group and <sup>\*</sup>*P* < 0.05, <sup>\*\*</sup>*P* < 0.01 vs. LPS-treated group.

Supplemental Figure 2:

### **Suppression of secretion of pro-inflammatory cytokines by OYF in PD mouse brains**

Midbrain have been obtained from mouse brains on day 7 after MPTP intoxication; then cytokine concentrations have been assessed using commercial ELISA kits. MPTP led to increased levels of pro-inflammatory TNF- $\alpha$ (A), IL-1 $\beta$ (B), and IL-6 (C). Pretreatment with OYF for 7 consecutive days significantly affect the levels of TNF- $\alpha$  and IL-1 $\beta$ . The elevated IL-6 level was only slightly reduced. All the values are depicted as mean  $\pm$  standard deviation (A-C, n = 6 per group). <sup>##</sup>*P* < 0.01 vs. control group and <sup>\*\*</sup>*P* < 0.01 vs. MPTP-treated group.

Supplemental Figure 3

**The glial activated in the PD mouse model and inhibited by the OYF pretreatment**

The representative IHC staining for GFAP<sup>+</sup> astrocytes in SNpc. Scale bar = 50 or 25  $\mu$ m. To obtain a better view of the GFAP-positive staining astroglia in SNpc, we zoomed in the figures as indicated in white rectangle.

Supplemental Figure 4:

**The protective effects of OYF against MPTP-mediated neuronal damage in the SNpc**

Representative images of SNpc TH-positive cell immunoreactivity (IR) with Scale bars, 200 or 100  $\mu$ m. To obtain a better view of the TH-positive staining DAN cells in SNpc, we zoomed in the figures as indicated in white rectangle.

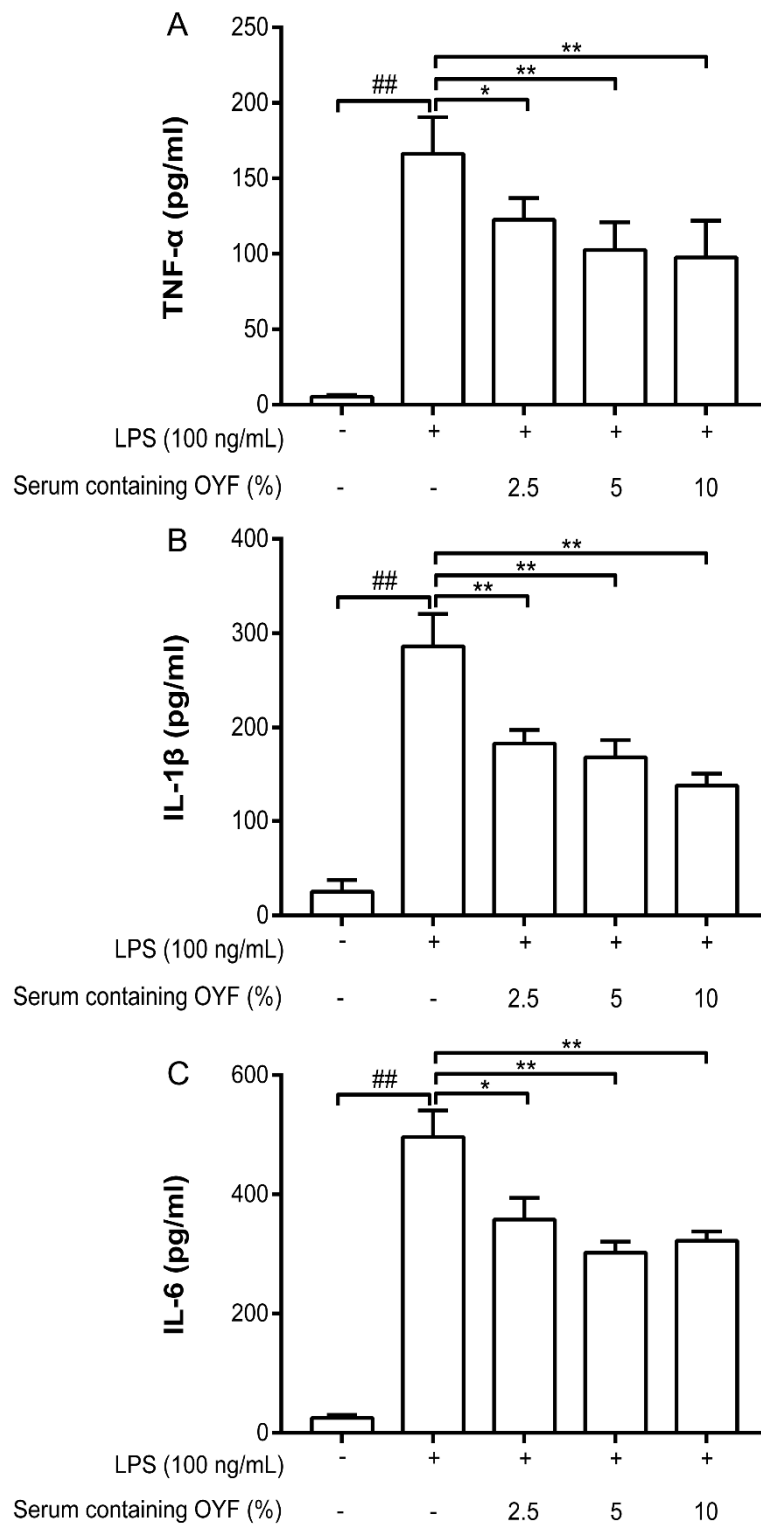

**Supplemental Figure 1. Suppression of secretion of pro-inflammatory cytokines by OYFCS in LPS-stimulated BV-2 cells.**

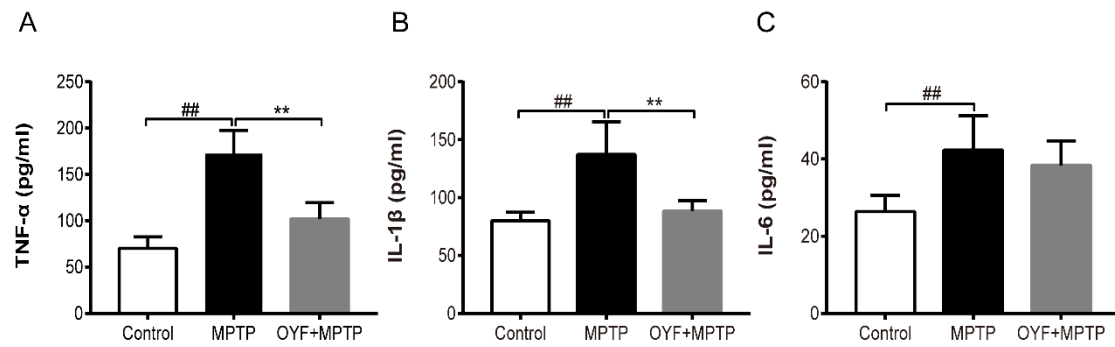

**Supplemental Figure 2. Suppression of secretion of pro-inflammatory cytokines by OYF in PD mouse brains**

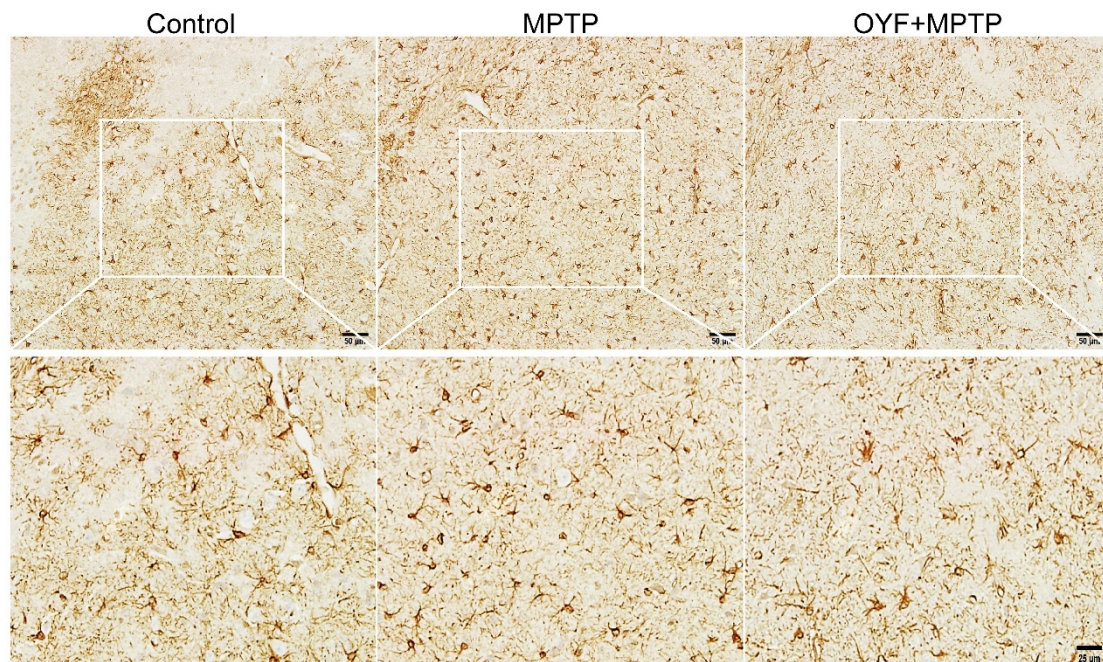

**Supplemental Figure 3. The glial activated in the PD mouse model and inhibited by the OYF pretreatment**

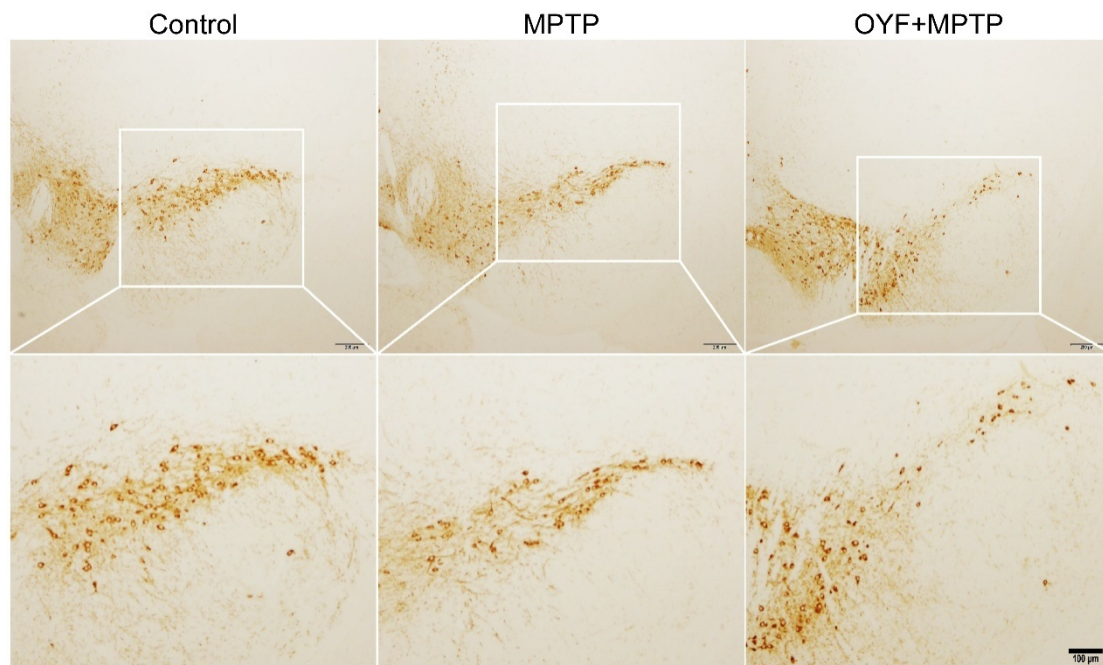

**Supplemental Figure 4. The protective effects of OYF against MPTP-mediated neuronal damage in the SNpc**
